# Supplementary material for: The boron–boron triple bond in NHC→BB←NHC
Source: Royal Society of Chemistry journal article supplement (doi:10.1039/c5sc01504a), 2015-01-01
Supplement: c5sc01504a1.pdf [file c5sc01504a1.pdf]

## Supporting Information for:

The boron-boron triple bond in  $\text{NHC} \rightarrow \text{B} \equiv \text{B} \leftarrow \text{NHC}$

Nicole Holzmann, Markus Hermann and Gernot Frenking

## Theoretical Methods

Geometry optimizations have been carried out using TurboMole 6.1 optimizer<sup>1</sup> and gradients at the BP86<sup>2</sup>/def2-TZVPP<sup>3</sup> level of theory. Stationary points were characterized as minima by calculating the Hessian matrix analytically at this level of theory. For all calculations the resolution-of-identity method has been applied.<sup>4</sup> For the calculation of the force constants a rigid scan of the B-B bond with a step size of 0.001 Å was performed. The force constant was then taken from a fitted polynomial of second order.

For the bonding analyses we calculated the molecules using the gradient corrected functional BP86<sup>2</sup> in conjunction with uncontracted Slater-type orbitals (STOs) as basis functions.<sup>5</sup> The latter basis sets for all elements have triple- $\zeta$  quality augmented by two sets of polarization functions (ADF-basis set TZ2P+). This level of theory is denoted BP86/TZ2P+. An auxiliary set of s, p, d, f, and g STOs was used to fit the molecular densities and to represent the Coulomb and exchange potentials accurately in each SCF cycle.<sup>6</sup> The BP86/TZ2P+ calculations were performed using with the program package ADF2013.01<sup>7</sup>

The interatomic interactions were investigated by means of an energy decomposition analysis (EDA, also termed extended transition state method - ETS) developed independently by Morokuma<sup>8</sup> and by Ziegler and Rauk.<sup>9</sup> The bonding analysis focuses on the instantaneous interaction energy  $\Delta E_{\text{int}}$  of a bond A–B between two fragments A and B in the particular electronic reference state and in the frozen geometry of AB. This interaction energy is divided into three main components [Eq. (1)].

$$\Delta E_{\text{int}} = \Delta E_{\text{elstat}} + \Delta E_{\text{Pauli}} + \Delta E_{\text{orb}} \quad (1)$$

The term  $\Delta E_{\text{elstat}}$  corresponds to the quasiclassical electrostatic interaction between the unperturbed charge distributions of the prepared atoms and is usually attractive. The Pauli repulsion  $\Delta E_{\text{Pauli}}$  is the energy change associated with the transformation from the superposition of the unperturbed electron densities  $\rho_A + \rho_B$  of the isolated fragments to the wavefunction  $\Psi^0 = N \hat{A}[\Psi_A \Psi_B]$ , which properly obeys the Pauli principle through explicit antisymmetrization ( $\hat{A}$  operator) and renormalization ( $N = \text{constant}$ ) of the product wavefunction.  $\Delta E_{\text{Pauli}}$  comprises the destabilizing interactions between electrons of the same spin on either fragment. The orbital interaction  $\Delta E_{\text{orb}}$  accounts for charge transfer and polarization effects. The  $\Delta E_{\text{orb}}$  term can be decomposed into contributions from each irreducible representation of the point group of the interacting system.

The EDA-NOCV<sup>10</sup> method combines charge (NOCV) and energy (EDA) decomposition schemes to decompose the deformation density which is associated with the bond formation,  $\Delta\rho$ , into different components of the chemical bond. The EDA-NOCV calculations provide pairwise energy contributions for each pair of interacting orbitals to the total bond energy. NOCV (Natural Orbital for Chemical Valence)<sup>11</sup> is defined as the eigenvector of the valence operator,  $\hat{V}$ , given by Equation (2):

$$\hat{V}\Psi_i = v_i\Psi_i \quad (2)$$

In the EDA-NOCV scheme the orbital interaction term,  $\Delta E_{\text{orb}}$ , is given by Equation (3):

$$\Delta E_{\text{orb}} = \sum_k \Delta E_k^{\text{orb}} = \sum_{k=1}^{\frac{N}{2}} v_k \left[ -F_{-k,-k}^{\text{TS}} + F_{k,k}^{\text{TS}} \right] \quad (3)$$

In which  $F_{-k,-k}^{\text{TS}}$  and  $F_{k,k}^{\text{TS}}$  are diagonal transition state Kohn-Sham matrix elements corresponding to NOCVs with the eigenvalues  $-v_k$  and  $v_k$ , respectively. The  $\Delta E_k^{\text{orb}}$  term of a particular type of bond are assigned by visual inspection of the shape of the deformation density,  $\Delta\rho_k$ .

**Table 1.** Coordinates and energies of the calculated molecules.

[(NHC)<sub>2</sub>(B<sub>2</sub>)]

E(BP86/def2-TZVPP) = -659.580594 a.u.

|   |           |           |           |
|---|-----------|-----------|-----------|
| N | 3.194667  | -0.250403 | 0.638309  |
| C | 2.175787  | 0.448447  | 0.000754  |
| N | 2.834001  | 1.492681  | -0.638680 |
| C | 4.198111  | 1.426758  | -0.403743 |
| C | 4.420951  | 0.349790  | 0.401068  |
| B | 0.719827  | 0.148506  | 0.001819  |
| B | -0.719827 | -0.148506 | 0.001819  |
| C | -2.175787 | -0.448447 | 0.000754  |
| N | -3.194667 | 0.250403  | 0.638309  |
| C | -4.420951 | -0.349790 | 0.401068  |
| C | -4.198111 | -1.426758 | -0.403743 |
| N | -2.834001 | -1.492681 | -0.638680 |
| C | -2.945585 | 1.409452  | 1.468438  |
| C | -2.144947 | -2.458763 | -1.467547 |
| C | 2.144947  | 2.458763  | -1.467547 |
| C | 2.945585  | -1.409452 | 1.468438  |
| H | 5.342545  | -0.034268 | 0.819387  |
| H | 4.891848  | 2.143816  | -0.823555 |
| H | -5.342545 | 0.034268  | 0.819387  |
| H | -4.891848 | -2.143816 | -0.823555 |
| H | -3.857944 | 2.013445  | 1.539262  |
| H | -2.619736 | 1.116356  | 2.477945  |
| H | -2.136600 | 1.997033  | 1.011100  |
| H | -2.751473 | -3.368041 | -1.552521 |
| H | -1.945846 | -2.054233 | -2.471433 |
| H | -1.177037 | -2.691166 | -1.000603 |
| H | 1.945846  | 2.054233  | -2.471433 |
| H | 1.177037  | 2.691166  | -1.000603 |
| H | 2.751473  | 3.368041  | -1.552521 |
| H | 2.136600  | -1.997033 | 1.011100  |
| H | 3.857944  | -2.013445 | 1.539262  |
| H | 2.619736  | -1.116356 | 2.477945  |

[(NHC)<sub>2</sub>(Al<sub>2</sub>)]

E(BP86/def2-TZVPP) = -1094.803378 a.u.

|    |           |           |          |
|----|-----------|-----------|----------|
| N  | 3.956664  | -0.888851 | 0.000000 |
| C  | 2.823333  | -0.095336 | 0.000000 |
| N  | 3.329263  | 1.189983  | 0.000000 |
| C  | 4.713461  | 1.182249  | 0.000000 |
| C  | 5.108057  | -0.122637 | 0.000000 |
| Al | 0.921521  | -0.814802 | 0.000000 |
| C  | 2.506492  | 2.384359  | 0.000000 |
| C  | 3.914327  | -2.339386 | 0.000000 |
| Al | -0.921565 | 0.814665  | 0.000000 |
| C  | -2.823304 | 0.095271  | 0.000000 |
| N  | -3.329163 | -1.189989 | 0.000000 |

|   |           |           |           |
|---|-----------|-----------|-----------|
| C | -4.713381 | -1.182357 | 0.000000  |
| C | -5.108142 | 0.122749  | 0.000000  |
| N | -3.956624 | 0.888788  | 0.000000  |
| C | -2.506511 | -2.384394 | 0.000000  |
| C | -3.914374 | 2.339412  | 0.000000  |
| H | -6.097882 | 0.561609  | 0.000000  |
| H | -5.297436 | -2.093785 | 0.000000  |
| H | 6.097814  | -0.561598 | 0.000000  |
| H | 5.297444  | 2.093853  | 0.000000  |
| H | 4.937951  | -2.729622 | 0.000000  |
| H | 3.384528  | -2.706125 | 0.891565  |
| H | 3.384528  | -2.706125 | -0.891565 |
| H | 3.156970  | 3.265975  | 0.000000  |
| H | 1.852451  | 2.393801  | -0.885077 |
| H | 1.852451  | 2.393801  | 0.885077  |
| H | -1.852453 | -2.393788 | -0.885038 |
| H | -1.852453 | -2.393788 | 0.885038  |
| H | -3.156966 | -3.265885 | 0.000000  |
| H | -3.384469 | 2.706152  | -0.891659 |
| H | -4.938065 | 2.729648  | 0.000000  |
| H | -3.384469 | 2.706152  | 0.891659  |

[(NHC)<sub>2</sub>(Ga<sub>2</sub>)]

E(BP86/def2-TZVPP) = -4460.173667 a.u.

|    |           |           |           |
|----|-----------|-----------|-----------|
| N  | 3.916804  | -0.994757 | 0.000000  |
| C  | 2.813933  | -0.165716 | 0.000000  |
| N  | 3.355229  | 1.101595  | 0.000000  |
| C  | 4.740240  | 1.051674  | 0.000000  |
| C  | 5.093648  | -0.264911 | 0.000000  |
| Ga | 0.859228  | -0.825181 | 0.000000  |
| C  | 2.562105  | 2.316077  | 0.000000  |
| C  | 3.820331  | -2.442686 | 0.000000  |
| Ga | -0.859162 | 0.824385  | 0.000000  |
| C  | -2.813912 | 0.165603  | 0.000000  |
| N  | -3.355374 | -1.101737 | 0.000000  |
| C  | -4.740316 | -1.051571 | 0.000000  |
| C  | -5.093687 | 0.265146  | 0.000000  |
| N  | -3.916771 | 0.994948  | 0.000000  |
| C  | -2.562297 | -2.316138 | 0.000000  |
| C  | -3.820081 | 2.442740  | 0.000000  |
| H  | -6.069404 | 0.734781  | 0.000000  |
| H  | -5.352829 | -1.944164 | 0.000000  |
| H  | 6.069420  | -0.734492 | 0.000000  |
| H  | 5.352636  | 1.944354  | 0.000000  |
| H  | 4.827955  | -2.872020 | 0.000000  |
| H  | 3.277328  | -2.788153 | 0.891853  |
| H  | 3.277328  | -2.788153 | -0.891853 |
| H  | 3.233200  | 3.181868  | 0.000000  |
| H  | 1.909464  | 2.340756  | -0.885577 |
| H  | 1.909464  | 2.340756  | 0.885577  |
| H  | -1.909668 | -2.340855 | -0.885597 |

|   |           |           |           |
|---|-----------|-----------|-----------|
| H | -1.909668 | -2.340855 | 0.885597  |
| H | -3.233572 | -3.181760 | 0.000000  |
| H | -3.276931 | 2.788141  | -0.891969 |
| H | -4.827711 | 2.872184  | 0.000000  |
| H | -3.276931 | 2.788141  | 0.891969  |

[(NHC)<sub>2</sub>(In<sub>2</sub>)]

E(BP86/def2-TZVPP) = -990.455381 a.u.

|    |           |           |           |
|----|-----------|-----------|-----------|
| N  | -4.378587 | -0.168772 | 0.000000  |
| C  | -3.117468 | 0.382197  | 0.000000  |
| N  | -3.354163 | 1.735878  | 0.000000  |
| C  | -4.713632 | 2.010697  | 0.000000  |
| C  | -5.360423 | 0.810740  | 0.000000  |
| In | -1.121146 | -0.815720 | 0.000000  |
| C  | -2.298963 | 2.733263  | 0.000000  |
| C  | -4.617535 | -1.600863 | 0.000000  |
| In | 1.121150  | 0.815714  | 0.000000  |
| C  | 3.117478  | -0.382194 | 0.000000  |
| N  | 3.354161  | -1.735860 | 0.000000  |
| C  | 4.713641  | -2.010695 | 0.000000  |
| C  | 5.360425  | -0.810745 | 0.000000  |
| N  | 4.378573  | 0.168761  | 0.000000  |
| C  | 2.298960  | -2.733266 | 0.000000  |
| C  | 4.617531  | 1.600876  | 0.000000  |
| H  | 6.418041  | -0.578043 | 0.000000  |
| H  | 5.102864  | -3.020843 | 0.000000  |
| H  | -6.418049 | 0.578040  | 0.000000  |
| H  | -5.102865 | 3.020848  | 0.000000  |
| H  | -5.696142 | -1.790149 | 0.000000  |
| H  | -4.170792 | -2.061366 | -0.893170 |
| H  | -4.170792 | -2.061366 | 0.893170  |
| H  | -2.746645 | 3.732633  | 0.000000  |
| H  | -1.661535 | 2.609111  | 0.888366  |
| H  | -1.661535 | 2.609111  | -0.888366 |
| H  | 1.661535  | -2.609112 | 0.888363  |
| H  | 1.661535  | -2.609112 | -0.888363 |
| H  | 2.746644  | -3.732632 | 0.000000  |
| H  | 4.170798  | 2.061361  | 0.893159  |
| H  | 5.696134  | 1.790148  | 0.000000  |
| H  | 4.170798  | 2.061361  | -0.893159 |

---

## References:

- 1 R. Ahlrichs, M. Baer, M Haeser, H. Horn, C. Koelmel, *Chem. Phys. Lett.* **162** (1989) 165.
- 2 a) A.D. Becke, *Phys. Rev. A* **1988**, 38, 3098. b) J.P.Perdew, *Phys. Rev. B* **33** (1986) 8822.

- 
- 3 F. Weigend, R. Ahlrichs, *Phys. Chem. Chem. Phys.* 2005, **7**, 3297.
- 4 K. Eichhorn, O. Treutler, H. Ohm, M. Häser, R. Ahlrichs, *Chem. Phys. Lett.* 1995, **242**, 652.
- 5 J.G. Snijders, E.J. Baerends, P. Vernooijs *At. Data Nucl. Data Tables* 1981, **26**, 483.
- 6 J. Krijn, E.J. Baerends, Fit Functions in the HFS-Method; Internal Report (in Dutch), Vrije Universiteit Amsterdam, The Netherlands (1984).
- 7 a) G. Te Velde, F.M. Bickelhaupt, E.J. Baerends, C. Fonseca Guerra, J.A. Van Gisbergen, J. Snijders, T. Ziegler *J. Comp. Chem.* 2001, **22**, 931. b) Computer code ADF 2013.01: see <http://www.scm.com>.
- 8 K. Morokuma, *J. Chem. Phys.* 1971, **55**, 1236.
- 9 T. Ziegler, A. Rauk, *Inorg. Chem.* 1979, **18**, 1755.
- 10 M.P. Mitoraj, A. Michalak, T. Ziegler, *J. Chem. Theory Comput.* 2009, **5**, 962.
- 11 a) M.P. Mitoraj, A. Michalak, *Organometallics* 2007, **26**, 6576. b) M.P. Mitoraj, A. Michalak, *J. Mol. Model.* 2008, **14**, 681.
